# Supplementary material for: Explaining clinical behaviors using multiple theoretical models
Source: Implement Sci. 2012 Oct 17;7:99. doi: 10.1186/1748-5908-7-99 (PMC3500222; doi:10.1186/1748-5908-7-99)
Supplement: Additional file 3 — Descriptive statistics for Common Sense Self Regulation Model for each of the five behaviors. [file 1748-5908-7-99-S3.pdf]

Additional File 3. Descriptive statistics for Common Sense Self-regulation Model for each of the five behaviours.

|                       | Taking Dental Radiographs |       |      |      | Performing Dental Restorations |       |      |      | Placing Fissure Sealants |   |       |      | Managing URTIs |                  |   |       |      | Managing Low Back Pain |                      |   |       |      |      |          |
|-----------------------|---------------------------|-------|------|------|--------------------------------|-------|------|------|--------------------------|---|-------|------|----------------|------------------|---|-------|------|------------------------|----------------------|---|-------|------|------|----------|
| Predictive Constructs | N                         | Alpha | Mean | SD   | N                              | Alpha | Mean | SD   | Constructs               | N | Alpha | Mean | SD             | Constructs       | N | Alpha | Mean | SD                     | Constructs           | N | Alpha | Mean | SD   | % agree  |
| Identity of condition | 3                         | 0.21  | 0.67 | 0.13 | 2                              | 0.15  | 3.35 | 1.10 |                          | 2 | 0.38  | 3.64 | 1.26           |                  | 2 | 1     | 3.70 | 1.00                   |                      | 3 | 0.49  | 4.20 | 0.80 |          |
| Duration              |                           |       |      |      |                                |       |      |      |                          |   |       |      |                |                  |   |       |      |                        |                      |   |       |      |      |          |
| Timeline acute        | 4                         | 0.44  | 4.68 | 1.00 | 2                              | 0.64  | 5.45 | 1.25 |                          | 2 | 0.46  | 5.50 | 1.12           |                  | 1 |       | 3.60 | 1.20                   |                      | 2 | 0.19  | 3.40 | 0.80 |          |
| Timeline cyclical     |                           |       |      |      | 2                              | 0.50  | 3.75 | 1.35 |                          | 2 | 0.42  | 3.49 | 1.35           |                  | 1 |       | 3.70 | 1.30                   |                      | 3 | 0.54  | 4.40 | 0.90 |          |
| Control by            |                           |       |      |      |                                |       |      |      |                          |   |       |      |                |                  |   |       |      |                        |                      |   |       |      |      |          |
| Overall               | 7                         | 0.46  | 5.57 | 0.71 |                                |       |      |      |                          |   |       |      |                |                  |   |       |      |                        |                      |   |       |      |      |          |
| treatment             |                           |       |      |      | 3                              | 0.15  | 5.83 | 0.87 |                          | 3 | 0.46  | 5.89 | 0.92           |                  | 2 | 0     | 2.80 | 0.95                   |                      | 3 | 0.66  | 5.60 | 0.80 |          |
| patient               |                           |       |      |      | 3                              | 0.64  | 3.80 | 0.83 |                          | 3 | 0.61  | 5.60 | 1.11           |                  | 2 | 1     | 4.75 | 1.10                   |                      | 2 | 0.85  | 5.70 | 1.00 |          |
| Clinician             |                           |       |      |      | 2                              | 0.17  | 5.30 | 0.95 |                          | 2 | 0.13  | 5.47 | 1.00           |                  | 2 | 1     | 4.05 | 1.20                   |                      | 2 | 0.36  | 5.30 | 0.90 |          |
| Cause                 |                           |       |      |      |                                |       |      |      |                          |   |       |      |                |                  |   |       |      |                        |                      |   |       |      |      |          |
| Overall               | 5                         | 0.28  | 4.32 | 0.68 |                                |       |      |      | Past care                | 1 |       | 2.67 | 1.49           | Stress           | 1 |       | 3.70 | 1.40                   | Stress               | 1 |       |      |      | 126 (42) |
|                       |                           |       |      |      |                                |       |      |      | Exposure to fluoride     | 1 |       | 4.68 | 1.71           | Chance/ bad luck | 1 |       | 4.30 | 1.50                   | Chance/ bad luck     | 1 |       |      |      | 140 (47) |
|                       |                           |       |      |      |                                |       |      |      | Chance or bad luck       | 1 |       | 2.39 | 1.48           | Social contact   | 1 |       | 5.20 | 1.00                   | Family problems      | 1 |       |      |      | 117 (39) |
|                       |                           |       |      |      |                                |       |      |      | Diet                     | 1 |       | 6.59 | 0.82           | viral prevalence | 1 |       | 5.50 | 0.90                   | Poor prior med. care | 1 |       |      |      | 66 (22)  |
|                       |                           |       |      |      |                                |       |      |      | Oral hygiene             | 1 |       | 6.28 | 1.21           | Air travel       | 1 |       | 4.70 | 1.20                   | Patient's behaviour  | 1 |       |      |      | 225 (85) |
|                       |                           |       |      |      |                                |       |      |      |                          |   |       |      |                |                  |   |       |      |                        | Ageing               | 1 |       |      |      | 217 (73) |
|                       |                           |       |      |      |                                |       |      |      |                          |   |       |      |                |                  |   |       |      |                        | Overwork             | 1 |       |      |      | 148 (49) |
| Consequence           | 4                         | 0.53  | 3.88 | 0.78 | 3                              | 0.46  | 5.23 | 1.00 |                          | 2 | 0.41  | 4.93 | 1.22           |                  | 2 | 0     | 4.00 | 1.50                   |                      | 2 | 0.21  | 4.80 | 0.80 |          |
| Emotional Response    | 4                         | 0.70  | 3.23 | 1.20 | 4                              | 0.65  | 3.60 | 1.15 |                          | 4 | 0.65  | 3.58 | 1.11           |                  | 4 | 1     | 2.40 | 0.93                   |                      | 4 | 0.69  | 5.10 | 1.00 |          |
| Coherence             | 4                         | 0.64  | 1.08 | 0.45 | 2                              | 0.69  | 2.40 | 1.05 |                          | 2 | 0.52  | 5.76 | 1.01           |                  | 2 | 1     | 5.55 | 0.90                   |                      | 2 | 0.74  | 2.70 | 1.00 |          |
